# Supplementary material for: The Polyamine Putrescine Contributes to H2O2 and RbohD/F-Dependent Positive Feedback Loop in Arabidopsis PAMP-Triggered Immunity
Source: PubMed Central journal article supplement (PMC6646693; doi:10.3389/fpls.2019.00894), 2019-07-16
Supplement: Data_Sheet_1.pdf [file Data_Sheet_1.pdf]

## **SUPPLEMENTARY MATERIAL**

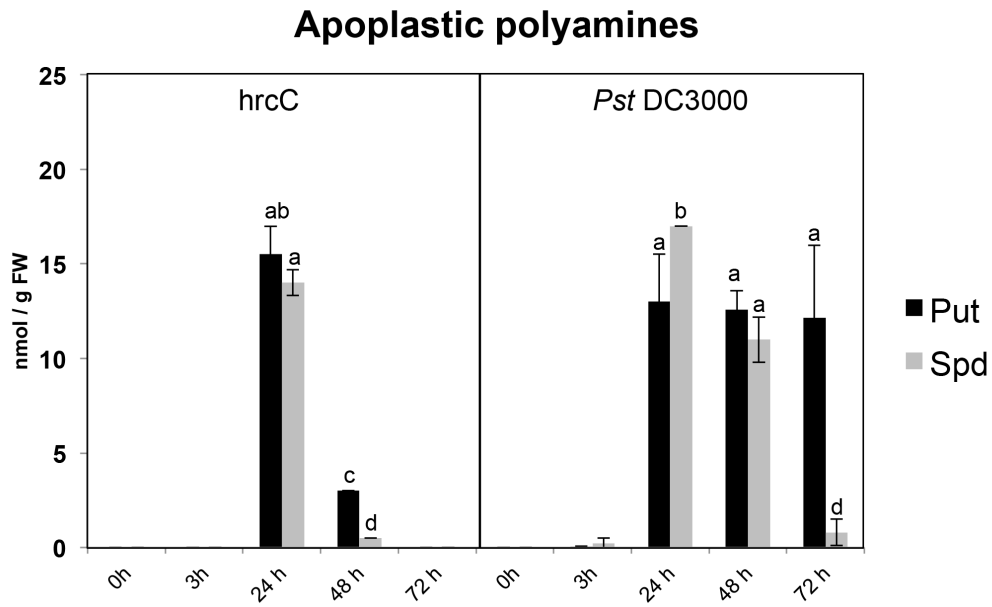

**Figure S1.** Levels of polyamines in apoplast enriched fluids of three-week old wild-type plants spray inoculated with *Pseudomonas syringae* pv. *tomato* DC3000 or *hrcC*. Samples for polyamine content determination were collected after 0 h, 3 h, 24 h, 48 h and 72 h of treatment. Values are the mean of three biological replicates  $\pm$  SD (standard deviation). Letters indicate values that are significantly different according to Student–Newman–Keuls test at  $P$  value  $<0.05$ .FW, fresh weight.

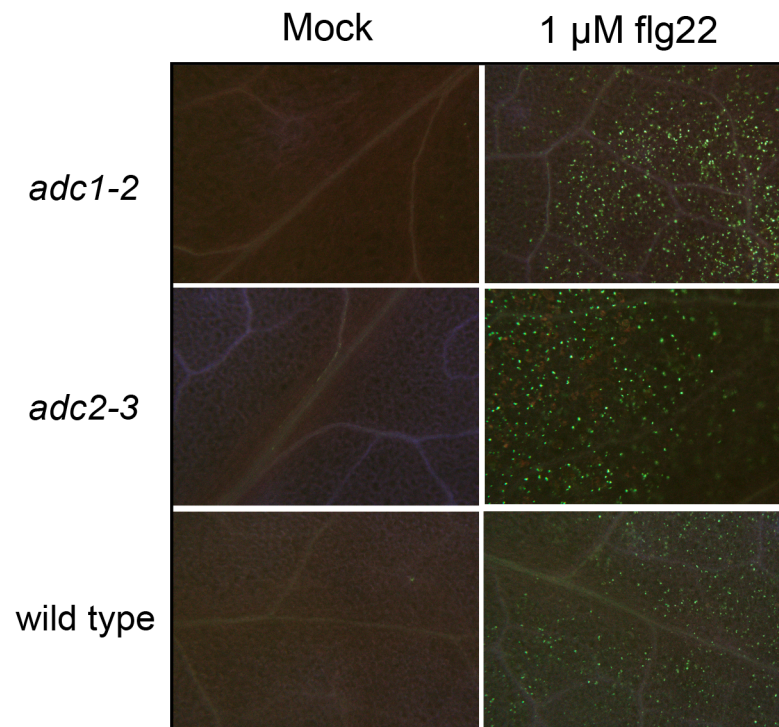

**Figure S2.** Aniline blue staining of callose deposits in *adc1-2*, *adc2-3* and wild-type seedlings treated with 1  $\mu$ M flg22 or mock for 24 h. Treatments were performed as described in Figure 3.

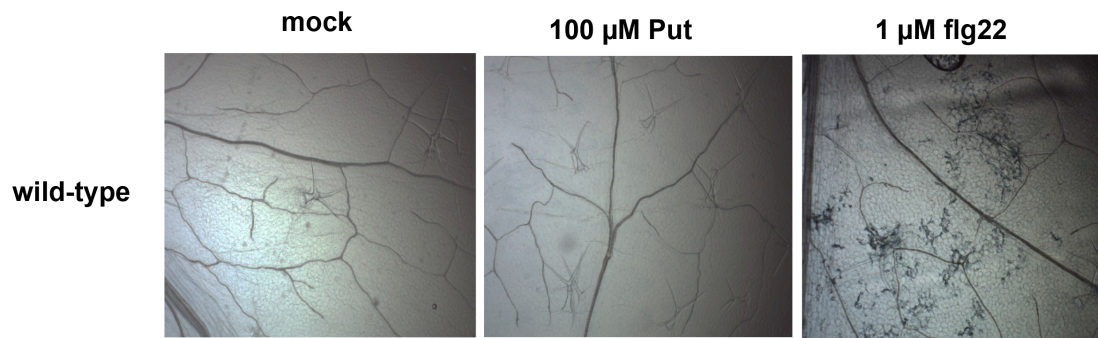

**Figure S3.** Trypan blue staining of 10-day old wild-type and *fls2* seedlings after 24 h of infiltration with 100 μM Put or 1 μM flg22. Treatments were performed in at least 12 different seedlings per genotype tested, showing similar results.

**Supplementary Table 1.** List of oligonucleotides and sequences used in this work.

| <b>Gene</b> | <b>Name</b> | <b>Forward (5' to 3')</b> | <b>Reverse (5' to 3')</b> |
|-------------|-------------|---------------------------|---------------------------|
| At3g18780   | Actin2      | GATTCAGATGCCCAGAAGTCTTGT  | TGGATTCCAGCAGCTTCC        |
| AT5g64890   | PROPEP2     | AGAAAAGCCTAGTTCAGGTCGTC   | CTCCTTATAAACTTGTATTGCCGC  |
| At5g64905   | PROPEP3     | GTTCCGGTCTCGAAAGTTCATC    | TCTTCCTCGCTGTGTGATGAC     |
| At4g01250   | WRKY22      | CGTCCTCTTTCTCTCTGCTTCTTC  | CCATGCCCAGACATCGGAGTTTA   |
| AT4g23550   | WRKY29      | TTTCACCTTCGTTTTGCCTACC    | CGAGCTCATCTAAGCCACTTGTC   |
| AT4g23810   | WRKY53      | GGAGAAGCGACAAGACACCAGA    | TATCCTTTGGCTTTTGGGTAATGG  |
| AT2g19190   | FRK1        | GCCAACGGAGACATTAGAG       | CCATAACGACCTGACTCATC      |
| AT5g57220   | CYP81F2     | AAATGGAGAGAGCAACACAATG    | ATCGCCCATTCGAATGTTAC      |
| AT5g26920   | CBP60g      | AAGAAGAATTGTCCGAGAGGAG    | GGCGAGTTTATGAAGCACAG      |
| At2g35980   | NHL10       | TTCCTGTCCGTAACCCAAAC      | CCCTCGTAGTAGGCATGAGC      |
